# Supplementary material for: A theoretical study on the formation mechanism and the sum-frequency generation spectra of hydrogenated graphene
Source: Royal Society of Chemistry journal article supplement (doi:10.1039/d5cp00038f), 2025-01-01
Supplement: d5cp00038f1.pdf [file d5cp00038f1.pdf]

## Supporting Information

### **A Theoretical Study on the Formation Mechanism and Sum-Frequency Generation Spectra of Hydrogenated Graphene**

Shenghao Cui,<sup>1</sup> Song Zhang,<sup>1</sup> Qing Wang,<sup>1</sup> Fumin Li,<sup>1</sup> Zhitao Shen<sup>1,2,\*</sup> Zhiying Ma,<sup>3,\*</sup>

<sup>1</sup>*Henan Key Laboratory of Quantum Materials and Quantum Energy, School of Quantum*

*Information Future Technology, Henan University, Kaifeng, 475004, China*

<sup>2</sup>*Institute of Quantum Materials and Physics, Henan Academy of Sciences, Zhengzhou, 450046,*

*China*

<sup>3</sup>*Institute of Nanoscience and Engineering, Henan University, Kaifeng, 475004, China*

\* Correspondence authors: [shenzt@vip.henu.edu.cn](mailto:shenzt@vip.henu.edu.cn), [mazy11@henu.edu.cn](mailto:mazy11@henu.edu.cn)

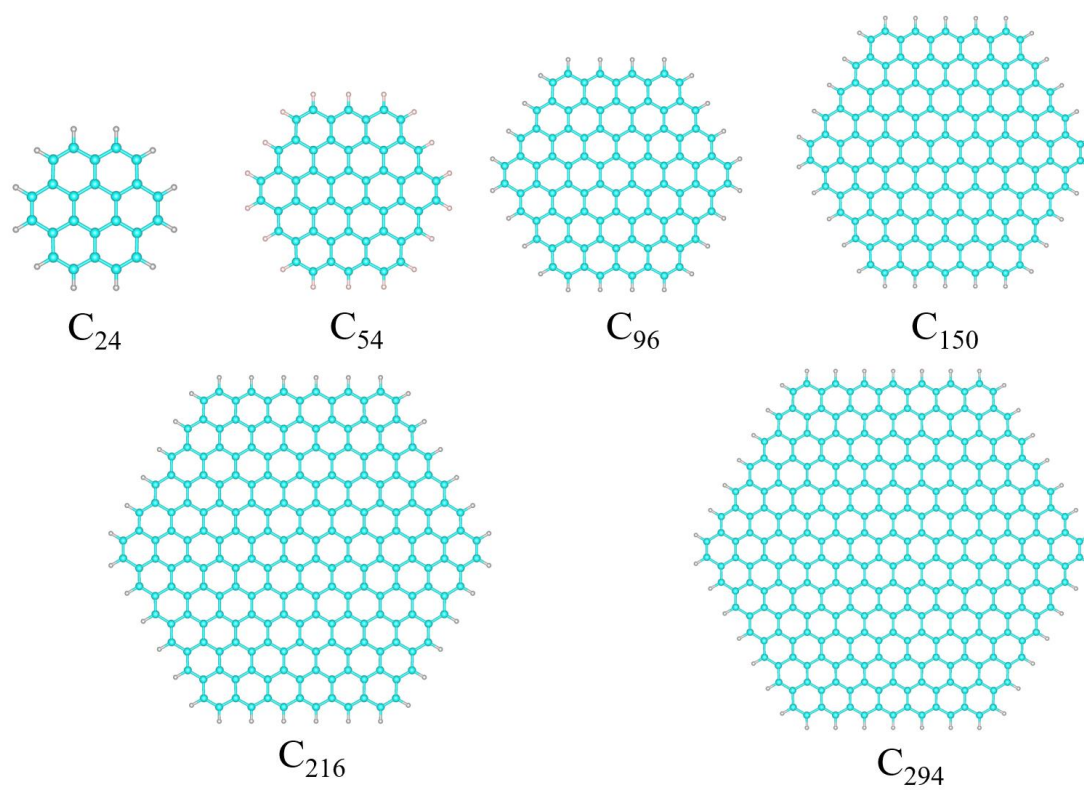

Fig. S1. Various sizes of graphene nanosheets with 24 (C<sub>24</sub>), 54 (C<sub>54</sub>), 96 (C<sub>96</sub>), 150 (C<sub>150</sub>), 216 (C<sub>216</sub>), and 294 (C<sub>294</sub>) carbon atoms. The edges are passivated with hydrogens.

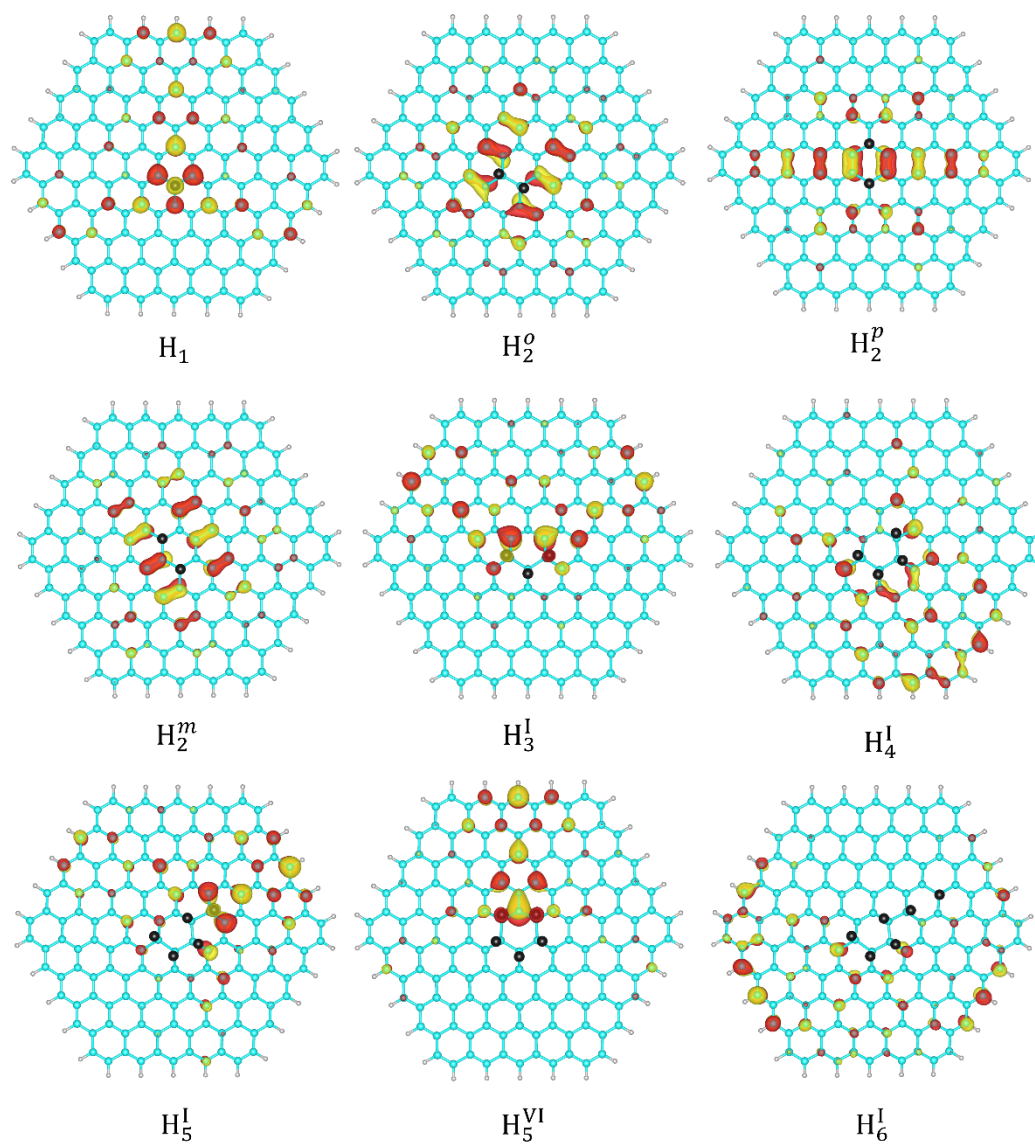

Fig. S2. Lowest unoccupied molecular orbitals (LUMOs) of the titled H-Gra, with an isosurface value of  $0.03 \text{ e/bohr}^3$ .

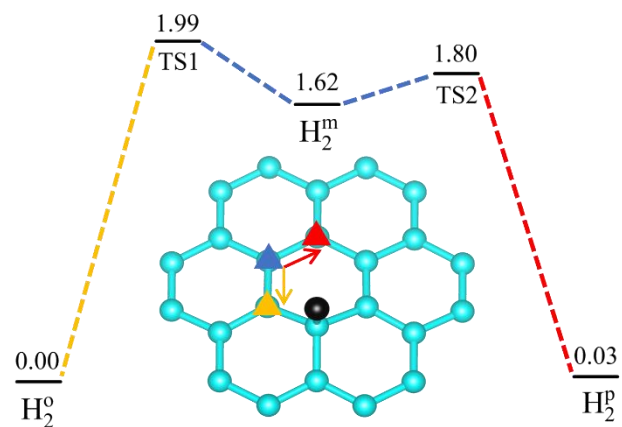

Fig. S3. Energy profile of the meta-dimer ( $H_2^m$ ) to the ortho- ( $H_2^o$ ) and para-dimer ( $H_2^p$ ) configurations.

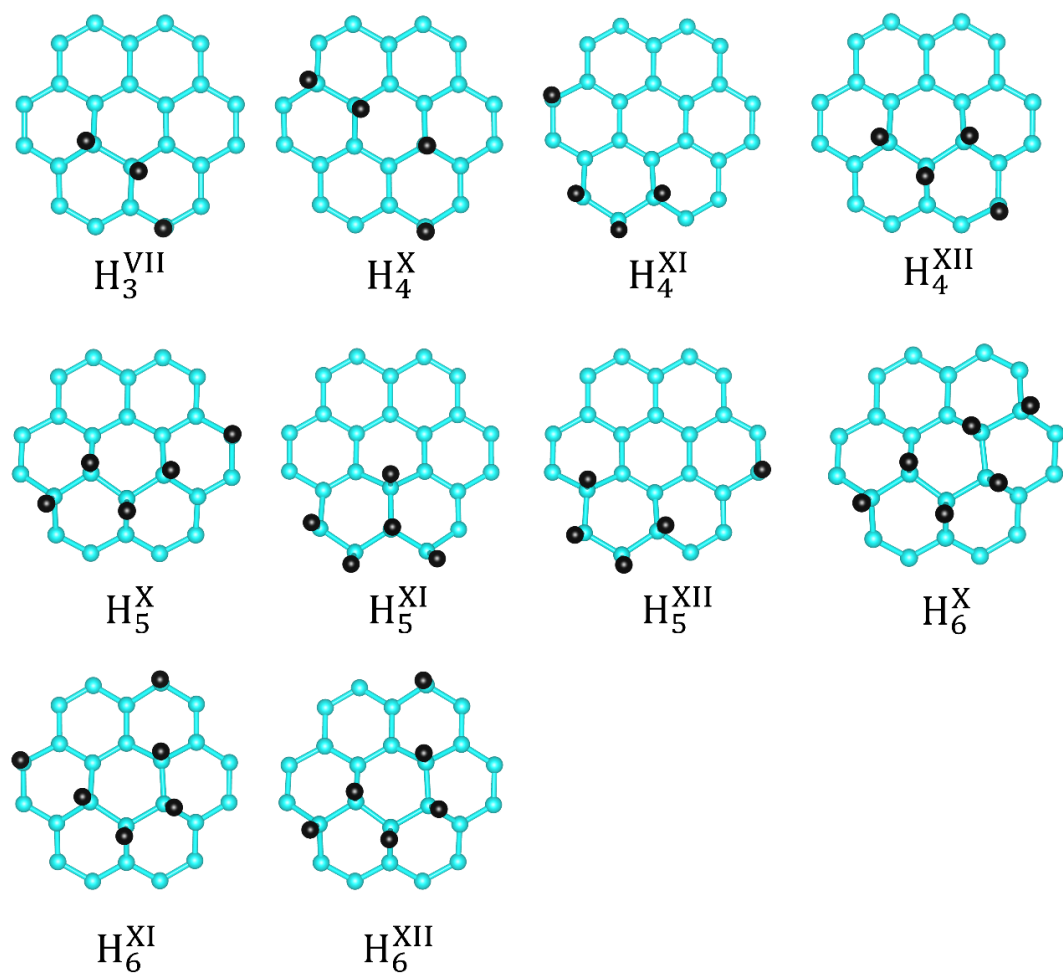

Fig. S4. Titled configurations of H-Gra with 3–6 hydrogen atoms adsorbed on graphene.

Table SI. Comparison of binding energies ( $E_b$ , eV) of H-monomer, dimer, and trimer adsorbed on the graphene between this work and previous studies.<sup>a</sup>

| XC functional      | Binding energy (eV) |                             |                             |                             |
|--------------------|---------------------|-----------------------------|-----------------------------|-----------------------------|
|                    | H <sub>1</sub>      | H <sub>2</sub> <sup>o</sup> | H <sub>2</sub> <sup>p</sup> | H <sub>3</sub> <sup>l</sup> |
| PW91 <sup>R1</sup> | 0.81                | 1.38                        |                             | 1.41                        |
| PBE <sup>R2</sup>  | 0.83                | 1.41                        | 1.38                        |                             |
| PBE <sup>R3</sup>  | 0.81                | 1.36                        | 1.34                        |                             |
| PBE <sup>R4</sup>  | 0.77                |                             |                             | 1.39                        |
| PBE <sup>R5</sup>  |                     |                             |                             | 1.39                        |
| B3LYP <sup>b</sup> | 0.81                | 1.47                        | 1.45                        | 1.49                        |

<sup>a</sup>Only the most stable H-trimer (H<sub>3</sub><sup>l</sup>) is listed here.

<sup>b</sup>Exchange-correlation (XC) functional used in this work. Refs. [R1-R5] corresponding to Refs.

[50,51,48,53,54] in the main text, respectively.

## References

- [R1] Ž. Šljivančanin, M. Andersen, L. Hornekær, and B. Hammer, Structure and Stability of Small H Clusters on Graphene, *Phys. Rev. B*, 2011, **83**, 205426.
- [R2] A. Ranjbar, M. S. Bahramy, M. Khazaei, H. Mizuseki, and Y. Kawazoe, First-Principles Study of Structural Stability, Magnetism, and Hyperfine Coupling in Hydrogen Clusters Adsorbed on Graphene, *Phys. Rev. B*, 2010, **82**, 165446.
- [R3] S. Sakong and P. Kratzer, Hydrogen Vibrational Modes on Graphene and Relaxation of the C–H Stretch Excitation from First-Principles Calculations, *J. Chem. Phys.*, 2010, **133**, 054505.
- [R4] T. Roman, H. Nakanishi, H. Kasai, K. Nobuhara, T. Sugimoto, and K. Tange, Stability of Three-Hydrogen Clusters on Graphene, *J. Phys. Soc. Jpn.*, 2009, **78**, 035002.
- [R5] T. Cao, L. Huang, X. Zheng, P. Gong and Z. Zeng, Understanding the stability and dynamical process of hydrogen trimers on graphene, *J. Appl. Phys.*, 2013, **113**, 173707.

Table SII. Binding energies ( $E_b$ , eV) and C–H distances ( $d_{\text{C-H}}$ , Å) of the corresponding configurations of H-Gra.<sup>a</sup>

| configuration             | $E_b$ | $d_{\text{C-H}}$ |
|---------------------------|-------|------------------|
| $\text{H}_3^{\text{VII}}$ | 1.25  | 1.105            |
| $\text{H}_4^{\text{X}}$   | 1.57  | 1.107            |
| $\text{H}_4^{\text{XI}}$  | 1.42  | 1.105            |
| $\text{H}_4^{\text{XII}}$ | 1.26  | 1.109            |
| $\text{H}_5^{\text{X}}$   | 1.62  | 1.104            |
| $\text{H}_5^{\text{XI}}$  | 1.60  | 1.101            |
| $\text{H}_5^{\text{XII}}$ | 1.49  | 1.104            |
| $\text{H}_6^{\text{X}}$   | 1.67  | 1.101            |
| $\text{H}_6^{\text{XI}}$  | 1.66  | 1.105            |
| $\text{H}_6^{\text{XII}}$ | 1.65  | 1.103            |

<sup>a</sup>The C–H distances in trimers and tetramers are averaged.

Table SIII. The assigned vibrational modes in the simulated SFG spectra as shown in Fig. 9(b), with associated vibrational frequencies (in  $\text{cm}^{-1}$ ) and configurations of H-Gra.<sup>a</sup>

| $\text{H}_2^p$                                                                                                                          | $\text{H}_2^o$                                                                                                                           |
|-----------------------------------------------------------------------------------------------------------------------------------------|------------------------------------------------------------------------------------------------------------------------------------------|
| 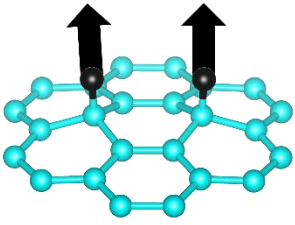<br>$\nu_{\text{sym}}^p$ ( $2852.9 \text{ cm}^{-1}$ )  | <br>$\nu_{\text{asym}}^o$ ( $2938.2 \text{ cm}^{-1}$ ) |
| <br>$\nu_{\text{asym}}^p$ ( $2866.3 \text{ cm}^{-1}$ ) | <br>$\nu_{\text{sym}}^o$ ( $2973.0 \text{ cm}^{-1}$ )  |

<sup>a</sup>The asymmetric vibrational modes,  $\nu_{\text{asym}}^p$  and  $\nu_{\text{asym}}^o$ , do not appear in the SFG spectra.

Table SIV. The assigned vibrational modes in the simulated SFG spectra as shown in Fig. 10(a),

with associated vibrational frequencies (in  $\text{cm}^{-1}$ ) and configurations of H-Gra.

| $\text{H}_3^{\text{I}}$                                                                                                                            | $\text{H}_3^{\text{II}}$                                                                                                                | $\text{H}_3^{\text{III}}$                                                                                                   |
|----------------------------------------------------------------------------------------------------------------------------------------------------|-----------------------------------------------------------------------------------------------------------------------------------------|-----------------------------------------------------------------------------------------------------------------------------|
| 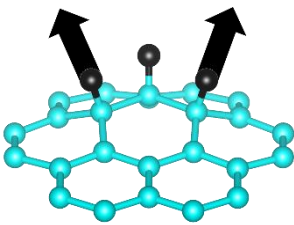<br>$\nu_{\text{sym}}^m$ ( $2920.3 \text{ cm}^{-1}$ )             | <br>$\nu^s$ ( $2837.2 \text{ cm}^{-1}$ )               | <br>$\nu^s$ ( $2847.4 \text{ cm}^{-1}$ )  |
| <br>$\nu_{\text{sym}}^{\text{H}_3}$ ( $3020.2 \text{ cm}^{-1}$ ) | <br>$\nu_{\text{sym}}^o$ ( $2960.3 \text{ cm}^{-1}$ ) | <br>$\nu^s$ ( $2881.7 \text{ cm}^{-1}$ ) |

Table SV. The assigned vibrational modes in the simulated SFG spectra as shown in Fig. 10(b), with associated vibrational frequencies (in  $\text{cm}^{-1}$ ) and configurations of H-Gra.

| $\text{H}_4^{\text{I}}$                                                            | $\text{H}_4^{\text{II}}$                                                          | $\text{H}_4^{\text{III}}$                                                           |
|------------------------------------------------------------------------------------|-----------------------------------------------------------------------------------|-------------------------------------------------------------------------------------|
| 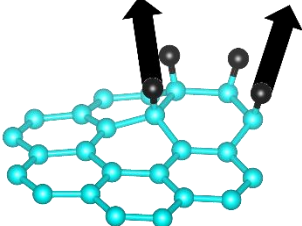  |  |   |
| $\nu_{\text{sym}}^p$ ( $2926.5 \text{ cm}^{-1}$ )                                  | $\nu_{\text{sym}}^{\text{H4}}$ ( $2956.9 \text{ cm}^{-1}$ )                       | $\nu^s$ ( $2846.2 \text{ cm}^{-1}$ )                                                |
|  |                                                                                   |  |
| $\nu_{\text{sym}}^o$ ( $3036.9 \text{ cm}^{-1}$ )                                  |                                                                                   | $\nu_{\text{sym}}^{\text{H3}}$ ( $3015.8 \text{ cm}^{-1}$ )                         |

Table SVI. The assigned vibrational modes in the simulated SFG spectra as shown in Fig. 10(c), with associated vibrational frequencies (in  $\text{cm}^{-1}$ ) and configurations of H-Gra.

| $\text{H}_5^{\text{I}}$                                                             | $\text{H}_5^{\text{II}}$                                                            | $\text{H}_5^{\text{III}}$                                                            |
|-------------------------------------------------------------------------------------|-------------------------------------------------------------------------------------|--------------------------------------------------------------------------------------|
| 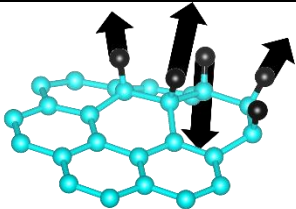   |    |    |
| $\nu_{\text{asym}}^{\text{H4}}$ ( $2970.6 \text{ cm}^{-1}$ )                        | $\nu_{\text{sym}}^{\text{p}}$ ( $2912.5 \text{ cm}^{-1}$ )                          | $\nu^{\text{s}}$ ( $2840.9 \text{ cm}^{-1}$ )                                        |
|   |    |    |
| $\nu_{\text{asym}}^{\text{H3}}$ ( $2992.1 \text{ cm}^{-1}$ )                        | $\nu_{\text{sym}}^{\text{o}}$ ( $2954.5 \text{ cm}^{-1}$ )                          | $\nu^{\text{s}}$ ( $2841.3 \text{ cm}^{-1}$ )                                        |
|  |  |  |
| $\nu_{\text{sym}}^{\text{o}}$ ( $3027.8 \text{ cm}^{-1}$ )                          | $\nu_{\text{sym}}^{\text{H3}}$ ( $3013.7 \text{ cm}^{-1}$ )                         | $\nu_{\text{sym}}^{\text{m}}$ ( $2931.2 \text{ cm}^{-1}$ )                           |
|                                                                                     |                                                                                     |  |
|                                                                                     |                                                                                     | $\nu_{\text{sym}}^{\text{H3}}$ ( $3008.8 \text{ cm}^{-1}$ )                          |

Table SVII. The assigned vibrational modes in the simulated SFG spectra as shown in Fig. 10(d),

with associated vibrational frequencies (in  $\text{cm}^{-1}$ ) and configurations of H-Gra.

| $\text{H}_6^{\text{I}}$                                                                                                                             | $\text{H}_6^{\text{II}}$                                                                                                                         | $\text{H}_6^{\text{III}}$                                                                                                                           |
|-----------------------------------------------------------------------------------------------------------------------------------------------------|--------------------------------------------------------------------------------------------------------------------------------------------------|-----------------------------------------------------------------------------------------------------------------------------------------------------|
| 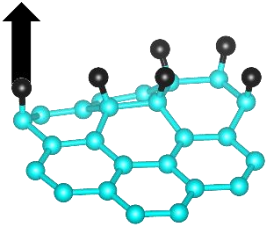<br>$\nu^s$ ( $2857.9 \text{ cm}^{-1}$ )                           | <br>$\nu^s$ ( $2919.9 \text{ cm}^{-1}$ )                        | <br>$\nu^s$ ( $2920.0 \text{ cm}^{-1}$ )                          |
| <br>$\nu^s$ ( $2919.5 \text{ cm}^{-1}$ )                           | <br>$\nu_{\text{sym}}^{\text{H4}}$ ( $3024.3 \text{ cm}^{-1}$ ) | <br>$\nu^s$ ( $2936.0 \text{ cm}^{-1}$ )                          |
| <br>$\nu_{\text{asym}}^{\text{H3}}$ ( $2968.9 \text{ cm}^{-1}$ ) |                                                                                                                                                  | <br>$\nu^s$ ( $2947.5 \text{ cm}^{-1}$ )                        |
| <br>$\nu_{\text{sym}}^o$ ( $3027.2 \text{ cm}^{-1}$ )            |                                                                                                                                                  | <br>$\nu_{\text{sym}}^{\text{H4}}$ ( $2991.6 \text{ cm}^{-1}$ ) |
|                                                                                                                                                     |                                                                                                                                                  | <br>$\nu_{\text{sym}}^o$ ( $3026.5 \text{ cm}^{-1}$ )           |
